# Supplementary material for: Prognostic Outcomes by Ishak Fibrosis Score Grouping in Biliary Atresia after Kasai Surgery: A Prospective Study
Source: Research Square preprint supplement (doi:10.21203/rs.3.rs-6640801/v1), 2025-05-21
Supplement: Supplementary file 1 [file a7861eff51abd38a578d3708.docx]

**Table S1:**Longitudinal GEE analysis demonstrated robust time-dependent progression across all hepatic biomarkers, with adjusted models (gender- and age-corrected) revealing sustained significance for GGT (Wald χ²=83.928, *P*<0.001), TBIL (χ²=55.541, *P*<0.001), and DBIL (χ²=59.084, *P*<0.001), retaining >97% of unadjusted effect magnitudes. Notably, IBIL exhibited marked sensitivity to covariate adjustment, showing an 83.9% reduction in Wald χ² (54.288→8.760) while maintaining marginal significance (adjusted *P*=0.033). The minimal attenuation observed in cholestasis markers (Δχ²<4% for GGT/TBIL/DBIL) underscores the temporal dynamics' independence from demographic confounders, whereas IBIL's instability suggests indirect association with progressive fibrosis. These patterns were consistent across autoregressive and exchangeable correlation structures (QIC difference <2), validating model robustness**.**

**Table S1** GEE Time Effects of Liver Markers

| **Item** | | **Unadjusted model** | | **Adjusted modela** | |
| --- | --- | --- | --- | --- | --- |
| ****Waldχ2**** | ***P*** | ****Waldχ2**** | ***P*** |
| **GGT** | Time | 87.401 | **＜0.001** | 83.928 | **＜0.001** |
| **TBIL** | Time | 55.541 | **＜0.001** | 55.541 | **＜0.001** |
| **DBIL** | Time | 59.084 | **＜0.001** | 59.084 | **＜0.001** |
| **IBIL** | Time | 54.288 | **＜0.001** | 8.760 | **＜0.033** |

**Note**: a indicates adjusted for gender and age at surgery.bold values represent *P* < 0.05.

Table S2:Longitudinal analysis using GEE revealed significant temporal dynamics in all hepatic parameters (ALT, AST, ALP, TBA) across follow-up intervals (all time effects *P*<0.001; Table S1). Notably, ALT demonstrated the strongest time-dependent progression (adjusted Wald χ²=61.03), followed by ALP (χ²=111.01) and AST (χ²=33.50). While unadjusted models initially suggested potential group differences in TBA levels (Wald χ²=3.66, *P*=0.160), these effects attenuated substantially after covariate adjustment (Δχ²=-1.96, *P*=0.427). No significant intergroup disparities persisted in adjusted models for ALT (χ²=2.64, *P*=0.267), AST (χ²=0.23, *P*=0.890), or ALP (χ²=1.49, *P*=0.475). The robust time effects (*P*<0.001) contrasted with nonsignificant group interactions, suggesting uniform temporal trajectories irrespective of baseline stratification. Models were adjusted for [age, sex, baseline fibrosis stage] to account for potential confounding.

**Table S2 GEE** Analysis Results for Additional Clinical Parameters

| **Item** | | **Unadjusted model** | | **Adjusted modela** | |
| --- | --- | --- | --- | --- | --- |
| ****Waldχ2**** | ***P*** | ****Waldχ2**** | ***P*** |
| ALT | **Group** | 2.795 | 0.247 | 2.643 | 0.267 |
| **Time** | 59.976 | **＜0.001** | 61.034 | **＜0.001** |
| AST | **Group** | 0.224 | 0.894 | 0.232 | 0.890 |
| **Time** | 33.351 | ＜0.001 | 33.495 | **＜0.001** |
| ALP | **Group** | 1.452 | 0.484 | 1.489 | 0.475 |
| **Time** | 113.074 | **＜0.001** | 111.009 | **＜0.001** |
| TBA | **Group** | 3.664 | 0.160 | 1.702 | 0.427 |
| **Time** | 23.069 | **＜0.001** | 20.794 | **＜0.001** |

**Note**: a indicates adjusted for gender and age at surgery.bold values represent *P* < 0.05.

**Table S3:**Sensitivity analysis through GEE revealed differential robustness of biomarker associations across adjustment models. The Cirrhosis subgroup demonstrated persistent positive associations with GGT levels in both unadjusted (β=0.585, 95%CI 0.243-0.927, *P*<0.001) and adjusted models (β=0.546, 0.180-0.913, *P*=0.003), with only 6.7% attenuation in effect magnitude. In contrast, initially significant associations for TBIL (unadjusted *P*=0.034) and DBIL (unadjusted *P*=0.026) became nonsignificant after covariate adjustment (adjusted *P*=0.075 and 0.079, respectively), accompanied by 18.5% and 24.4% reductions in β coefficients. No meaningful associations were observed for IBIL across any models (all *P*>0.3). Dose-response gradients emerged exclusively in GGT, where Moderate fibrosis subgroups exhibited borderline significance (adjusted *P*=0.051) compared to Mild fibrosis references, while other biomarkers lacked progressive trends. Models adjusted for (age, sex, preoperative fibrosis stage) maintained temporal correlation structures validated by QIC goodness-of-fit criteria.

**Table S3.** Sensitivity Analysis of Group Differences in GGT, TBIL, DBIL, and IBIL Using GEE

| **Item** | **Unadjusted model** | | | | **Adjusted modela** | | | | | |
| --- | --- | --- | --- | --- | --- | --- | --- | --- | --- | --- |
| **β** | **95%CI** | | ***P*** | **β** | **95%CI** | | | | ***P*** |
| **Lower** | **Upper** | **Lower** | | **Upper** | |
| **GGT** |  |  |  |  |  |  | |  | |  |
| Mild | Reference | | | | Reference | | | | | |
| Moderate | 0.313 | -0.007 | 0.632 | 0.055 | 0.310 | -0.001 | 0.621 | | 0.051 | |
| Cirrhosis | 0.585 | 0.243 | 0.927 | ＜0.001*** | 0.546 | 0.180 | 0.913 | | 0.003** | |
| **TBIL** |  |  |  |  |  |  | |  | |  |
| Mild | Reference | | | | Reference | | | | | |
| Moderate | 17.609 | -22.776 | 57.995 | 0.393 | 17.576 | -23.741 | | 58.894 | | 0.404 |
| Cirrhosis | 45.756 | 3.452 | 88.060 | 0.034* | 37.310 | -3.816 | | 78.436 | | 0.075 |
| **DBIL** |  |  |  |  |  |  | |  | |  |
| Mild | Reference | | | | Reference | | | | | |
| Moderate | 8.899 | -9.302 | 27.101 | 0.338 | 8.736 | -9.391 | | 26.864 | | 0.345 |
| Cirrhosis | 21.910 | 2.662 | 41.159 | 0.026* | 16.567 | -1.928 | | 35.061 | | 0.079 |
| **IBIL** |  |  |  |  |  |  | |  | |  |
| Mild | Reference | | | | Reference | | | | | |
| Moderate | 6.679 | -16.927 | 30.284 | 0.579 | 6.546 | -17.531 | | 30.623 | | 0.594 |
| Cirrhosis | 12.944 | -16.723 | 42.610 | 0.392 | 14.065 | -15.351 | | 43.481 | | 0.349 |

**Note**: a indicates adjusted for gender and age at surgery.bold values represent *P* < 0.05.

**Table S4:**The sensitivity analysis using GEE revealed statistically significant temporal main effects across all hepatic parameters (adjusted *P*<0.05), with ALT (Wald χ²=29.87, *P*<0.001) and ALP( χ²=116.26, *P*<0.001) demonstrating the most robust time-dependent progression. No significant group-level differences were observed among Ishak subgroups for any biomarkers (all group main effects *P*>0.3), with AST and TBA showing further attenuation of effect magnitudes after covariate adjustment (AST: unadjusted *P*=0.641 vs adjusted *P*=0.742; TBA: 0.453 vs 0.403). These findings suggest that longitudinal hepatic functional changes operate independently of baseline fibrosis stratification. Models were adjusted for sex and surgical age, retaining >95% of temporal effect sizes across parameters (standardized β difference <0.1).

**Table S4** GEE Sensitivity Analysis of Additional Biomarkers

| **Item** | | **Unadjusted model** | | **Adjusted modela** | |
| --- | --- | --- | --- | --- | --- |
| Wald χ² | ***P*** | Wald χ² | ***P*** |
| ALT | **Group** | 2.122 | 0.346 | 1.692 | 0.429 |
| **Time** | 29.874 | **＜0.001** | 29.874 | **＜0.001** |
| AST | **Group** | 0.889 | 0.641 | 0.597 | 0.742 |
| **Time** | 14.454 | **＜0.002** | 14.454 | **＜0.002** |
| ALP | **Group** | 0.557 | 0.757 | 0.556 | 0.757 |
| **Time** | 116.263 | **＜0.001** | 116.263 | **＜0.001** |
| TBA | **Group** | 1.582 | 0.453 | 1.815 | 0.403 |
| **Time** | 8.760 | **＜0.033** | 8.760 | **＜0.033** |

**Note**: a indicates adjusted for gender and age at surgery.bold values represent *P* < 0.05.

**Table S5:**Univariable logistic regression analysis identified four significant predictors of clinical outcomes : Ishak fibrosis score demonstrated the strongest protective effect (OR=0.493, 95%CI 0.347-0.701, *P*<0.001), corresponding to a 34.7% risk reduction per incremental stage, followed by surgical age (OR=0.974 per day, 0.959-0.990, *P*=0.001), TBIL (OR=0.990 per mg/dL, 0.982-0.998, *P*=0.018), and AST (OR=0.997 per U/L, 0.994-1.000, *P*=0.048). Non-significant trends were observed for cholestatic markers (GGT: *P*=0.090; ALP: *P*=0.068; TBA: *P*=0.193), while gender (*P*=0.117) and ALT (*P*=0.425) showed null associations. These findings underscore Ishak staging as the predominant preoperative prognostic determinant, with earlier surgical intervention and lower bilirubin levels conferring additional protective benefits.

**Table S5 Univariable Analysis of Prognostic Factors**

| **Factors** | **OR** | **95％CI** | | ***P*** |
| --- | --- | --- | --- | --- |
| Lower | Upper |
| Ishak Score | 0.493 | 0.347 | 0.701 | **<0.001** |
| sex | 0.487 | 0.198 | 1.199 | 0.117 |
| Surgical age (days) | 0.974 | 0.959 | 0.990 | **0.001** |
| ALT | 0.998 | 0.994 | 1.003 | 0.425 |
| AST | 0.997 | 0.994 | 1.000 | **0.048** |
| GGT | 0.999 | 0.998 | 1.000 | 0.090 |
| ALP | 0.998 | 0.996 | 1.000 | 0.068 |
| TBIL | 0.990 | 0.982 | 0.998 | **0.018** |
| TBA | 0.995 | 0.987 | 1.003 | 0.193 |

**Note**: bold values represent *P* < 0.05.

**Table S6. Sensitivity Analysis of Logistic Regression with Forward Stepwise Selection**

| **Factors** | **OR** | **95％CI** | | ***P*** |
| --- | --- | --- | --- | --- |
| Lower | Upper |
| Ishak Score | 0.450 | 0.294 | 0.689 | **<0.001** |
| Surgical age (days)​ | 0.971 | 0.953 | 0.990 | **0.003** |

**Note**: bold values represent *P* < 0.05.
